# Supplementary material for: Discovery of Genetic Variation on Chromosome 5q22 Associated with Mortality in Heart Failure
Source: PubMed Central journal article supplement (PMC4858216; doi:10.1371/journal.pgen.1006034), 2016-05-05

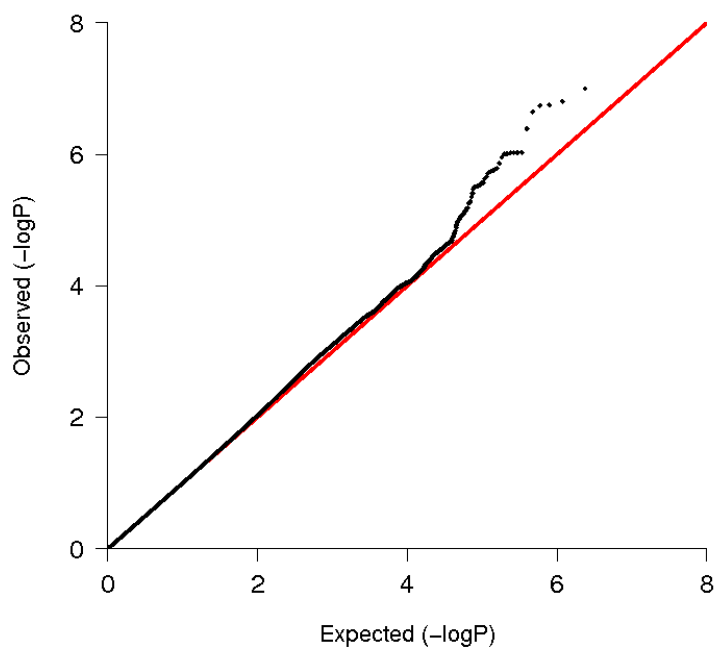

Supplement: pgen.1006034.s003.pdf [file pgen.1006034.s003.pdf]
